# Supplementary material
Source: PubMed Central journal article supplement (PMC6533598)
Supplement: ac9b00244_si_001.pdf [file ac9b00244_si_001.pdf]

## Supplementary Information

A Approach to Illuminate Biological Interactions with In Vivo Protein Footprinting

Jessica A. Espino and Lisa M. Jones\*

Department of Pharmaceutical Sciences, University of Maryland, Baltimore, MD 21201

\*Correspondence to:

Lisa M. Jones

Department of Pharmaceutical Sciences

University of Maryland, Baltimore, MD 21201

Phone number: (410) 706-3380

Email: ljones@rx.umaryland.edu

### Table of Contents

|                                                                                              |    |
|----------------------------------------------------------------------------------------------|----|
| Supplementary methods .....                                                                  | S1 |
| Supplemental Figures .....                                                                   | S3 |
| Figure S1. ....                                                                              | S3 |
| Figure S2. ....                                                                              | S4 |
| Figure S3. ....                                                                              | S5 |
| Figure S4. ....                                                                              | S6 |
| Supplementary references .....                                                               | S7 |
| Supplementary Table 1. IV-FPOP oxidatively modified proteins and identified body system..... | S8 |

## Supplementary methods

**Viability Assay.** Assays were performed as described previously by Ferreira *et al.*<sup>1</sup> with slight modifications. Synchronous L1 stage worms were obtained by hypochlorite treatment of gravid adults. Eggs were separated from debris by centrifugation in a 30% sucrose solution. Eggs were allowed to hatch for 18 h in M9 medium (0.02 M KH<sub>2</sub>PO<sub>4</sub>, 0.08 M Na<sub>2</sub>HPO<sub>4</sub>, 0.08 M NaCl, 1 mM MgSO<sub>4</sub>) at 20 °C. The resulting L1 larvae were washed three times with deionized water (diH<sub>2</sub>O) then transferred to standard E. coli OP50-seeded NGM plates and incubated at 20 °C until L4 larvae stage (~48 h post L1 incubation). After incubation, plates were washed with M9 medium and L4 larvae were collected. Larvae were washed three times with M9 medium in order to clean off bacteria. Approximately 1,000 larvae were added to each well in a 96-well plate. Worms were incubated with 20, 40, 60, 100, 120, 140, 160, 180, and 200 mM final H<sub>2</sub>O<sub>2</sub> concentrations for 30 s and, immediately after, the reaction was stopped using a cell permeable quench buffer that contained 40 mM N'-Dimethylthiourea (DMTU), 40 mM N-tert-Butyl- $\alpha$ -phenylnitro (PBN), 10 mM of worm anesthetic levamisole hydrochloride, and 40  $\mu$ M propidium iodide (PI). The volume of quench buffer added was 1:1 for a final PI concentration of 20  $\mu$ M. Positive control wells contained M9 medium and quench solution while negative control wells contained 50% methanol and quench solution. Microplates were incubated for 15 min at room temperature, imaged using a Nikon Eclipse TI fluorescent microscope, and analyzed using General Analysis in the Nikon Elements AR High Content Analysis software package (Version 4.50.00). Viability was calculated using equation 1:

$$\frac{\# \text{ BF items} - \# \text{ PI items}}{\# \text{ BF items}}$$

where # BF items represents the total number of worms observed under bright field and # PI items represents total dead worms observed under fluorescence. All assays were performed in biological duplicates and technical triplicates.

**IV-FPOP.** For IV-FPOP studies, we examined the extent of FPOP modifications in the presence of 20, 60, 100, 140, 200 mM H<sub>2</sub>O<sub>2</sub>. L4 larvae were selected for analysis due to their developed adult-like characteristics<sup>2</sup> without the contamination of fetal phenotypes that would be present in egg carrying adults. With a laser frequency of 20 Hz and a worm flow rate of 147  $\mu$ L/min, data was collected for two BR at each concentration. The extent of modification for each oxidatively modified protein was calculated. To normalize background oxidation, control samples containing H<sub>2</sub>O<sub>2</sub> but without laser irradiation were analyzed. Worms alone, without the addition of H<sub>2</sub>O<sub>2</sub> were also analyzed to consider naturally occurring oxidations. Worms alone had a significant number of oxidatively modified proteins (Supplementary Fig. 2). The source of this oxidation is unknown since worm samples were carefully handled to minimize stress to the animals. Nonetheless, other proteomics studies looking at oxidation levels in the worms have shown naturally occurring oxidations at different larval stages<sup>3-4</sup>. A large number of the modified proteins identified in the H<sub>2</sub>O<sub>2</sub> treated worms without laser irradiation were also modified in the worms alone (Supplementary Fig. 2). The addition of H<sub>2</sub>O<sub>2</sub> resulted in additional modified proteins indicating some oxidation is induced at low incubation times although an increase with concentration was not observed. The background oxidation from both worms alone and control worms were subtracted from the FPOP samples for quantitation.

## Supplemental Figures

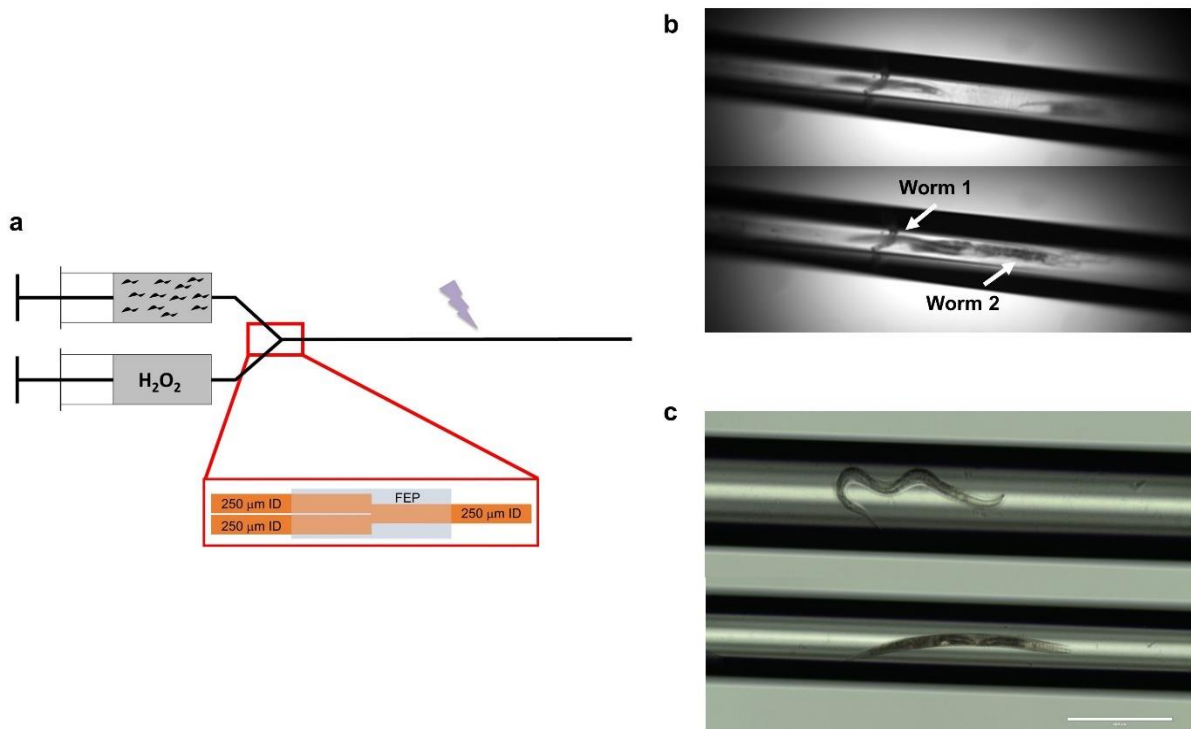

**Figure S1.** a. IV-FPOP flow system. Schematic of IV-FPOP flow system showing mixing tee (orange). Two capillaries of 250 μm ID are inserted of one end of a fluorinated ethylene propylene (FEP) (blue), a third capillary is inserted at the opposite end. C. *elgans* flowing through the laser irradiation window through a 150 μm b. 250 μm c. ID capillary. The worms are more tightly compacted in the smaller capillary, including the overlap of worm during flow, leading to an excess of clogging.

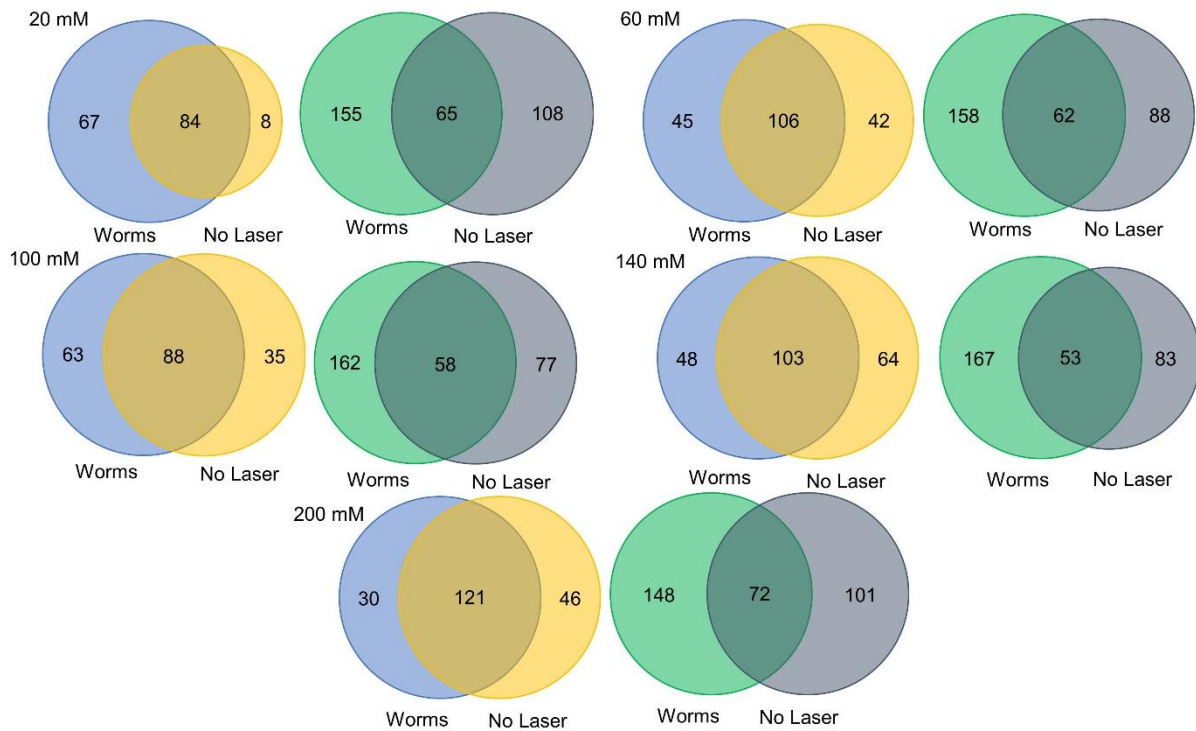

**Figure S2.** Background oxidation in the presence and absence of hydrogen peroxide. Venn diagrams representing the total number of oxidized proteins in *C. elegans* under six hydrogen peroxide conditions, 0 (worms only), 20, 60 100, 140, or 200 mM in the absence of laser irradiation. Blue and yellow diagrams represent biological replicate 1, green and grey represent biological replicate 2.

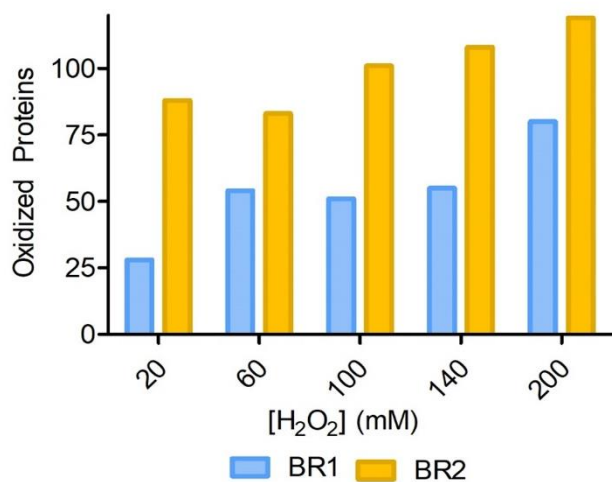

**Figure S3.** Comparison of the total number of oxidatively modified proteins through IV-FPOP between biological replicate 1 (blue) and biological replicate 2 (yellow) at 20, 60, 100, 140, and 200 mM hydrogen peroxide.

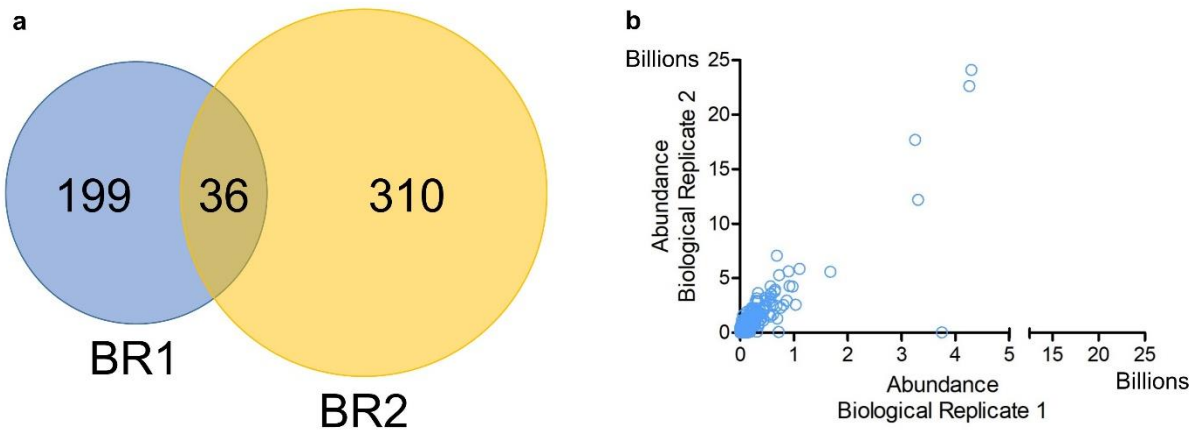

**Figure S4.** a. Venn diagrams of oxidatively modified proteins in the presence of 200 mM hydrogen peroxide at 50 Hz in biological replicate 1 is in blue biological replicate 2 is in yellow. b. Protein abundance differences between biological replicate 1 and 2 for 200 mM hydrogen peroxide at 50 Hz, proteins are more highly expressed in biological replicate 2.

## Supplementary references

1. Ferreira, S.; Rodrigo, o.; Mendes, T. A.; Oliveira, n.; Bueno, L. L.; Ara, d.; jo, J. V.; Bartholomeu, D. C.; Fujiwara, R. T., A New Methodology for Evaluation of Nematode Viability. *BioMed Research International* **2015**, 2015, 7.
2. Hart, A. C., Behavior (July 3, 2006). WormBook, Ed. The *C. elegans* Research Community, WormBook.
3. Boyd-Kimball, D.; Poon, H. F.; Lynn, B. C.; Cai, J.; Pierce, W. M., Jr.; Klein, J. B.; Ferguson, J.; Link, C. D.; Butterfield, D. A., Proteomic identification of proteins specifically oxidized in *Caenorhabditis elegans* expressing human A $\beta$ (1-42): implications for Alzheimer's disease. *Neurobiol Aging* **2006**, 27 (9), 1239-49.
4. Kumsta, C.; Thamsen, M.; Jakob, U., Effects of Oxidative Stress on Behavior, Physiology, and the Redox Thiol Proteome of *Caenorhabditis elegans*. *Antioxidants & Redox Signaling* **2011**, 14 (6), 1023-1037.



**Supplementary Table 1. IV-FPOP oxidatively modified proteins and identified body system**

| UniProt ID | Protein names                                                       | Biological Replicate | Gene    | Body System                                                      | Peptides Modified No. |
|------------|---------------------------------------------------------------------|----------------------|---------|------------------------------------------------------------------|-----------------------|
| P41932     | 14-3-3-like protein 1                                               | Biological 2 Only    | par-5   | excretory, muscle, reproductive                                  | 3                     |
| G5EF18     | 1-phosphatidylinositol 4,5-bisphosphate phosphodiesterase epsilon-1 | Biological 1 Only    | plc-1   | alimentary                                                       | 1                     |
| A8WFH3     | 2 (Zwei) IG domain protein                                          | Biological 1 Only    | zig-10  | nervous                                                          | 1                     |
| Q19278     | 3-hydroxyisobutyryl-CoA hydrolase, mitochondrial                    | Biological 1 Only    | hach-1  | alimentary, epithelial, excretory, muscle, nervous, reproductive | 1                     |
| P48150     | 40S ribosomal protein S14                                           | Biological 2 Only    | rps-14  | alimentary, epithelial                                           | 1                     |
| Q9XVP0     | 40S ribosomal protein S15                                           | Both                 | rps-15  | nervous                                                          | 2                     |
| P51403     | 40S ribosomal protein S2                                            | Biological 2 Only    | rps-2   | reproductive                                                     | 1                     |
| P49197     | 40S ribosomal protein S21                                           | Biological 2 Only    | rps-21  | alimentary, epithelial, excretory, muscle, nervous               | 2                     |
| Q9TXP0     | 40S ribosomal protein S27                                           | Biological 2 Only    | rps-27  | alimentary, epithelial, excretory, muscle                        | 1                     |
| P48152     | 40S ribosomal protein S3                                            | Biological 2 Only    | rps-3   | alimentary                                                       | 4                     |
| P49041     | 40S ribosomal protein S5                                            | Biological 2 Only    | rps-5   | reproductive                                                     | 2                     |
| Q9NEN6     | 40S ribosomal protein S6                                            | Biological 1 Only    | rps-6   | alimentary, epithelial, excretory, muscle, nervous, reproductive | 2                     |
| P48156     | 40S ribosomal protein S8                                            | Biological 2 Only    | rps-8   | alimentary, reproductive                                         | 1                     |
| G5EBI0     | 4D656                                                               | Biological 2 Only    | 4D656   | alimentary, epithelial, excretory, muscle, nervous, reproductive | 1                     |
| Q93572     | 60S acidic ribosomal protein P0                                     | Biological 2 Only    | rla-0   | alimentary, epithelial, excretory, muscle, nervous, reproductive | 4                     |
| O01504     | 60S acidic ribosomal protein P2                                     | Biological 2 Only    | C37A2.7 | nervous                                                          | 2                     |
| P91128     | 60S ribosomal protein L13                                           | Biological 2 Only    | rpl-13  | alimentary, epithelial, excretory, muscle, nervous, reproductive | 1                     |

| UniProt ID | Protein names                                                                                                    | Biological Replicate | Gene     | Body System                                                      | Peptides Modified No. |
|------------|------------------------------------------------------------------------------------------------------------------|----------------------|----------|------------------------------------------------------------------|-----------------------|
| O02639     | 60S ribosomal protein L19                                                                                        | Biological 1 Only    | rpl-19   | alimentary, excretory, muscle, nervous                           | 1                     |
| P34334     | 60S ribosomal protein L21                                                                                        | Biological 2 Only    | rpl-21   | reproductive                                                     | 1                     |
| P48162     | 60S ribosomal protein L23a 1                                                                                     | Biological 1 Only    | rpl-25.1 | alimentary, nervous                                              | 1                     |
| Q19869     | 60S ribosomal protein L26                                                                                        | Biological 1 Only    | rpl-26   | alimentary, epithelial, excretory, muscle, nervous, reproductive | 3                     |
| O45226     | 60S ribosomal protein L29                                                                                        | Biological 1 Only    | rpl-29   | alimentary, nervous                                              | 1                     |
| Q9XVF7     | 60S ribosomal protein L8                                                                                         | Biological 2 Only    | rpl-2    | alimentary, epithelial, excretory, muscle, nervous, reproductive | 4                     |
| Q19554     | ABC transporter, class F                                                                                         | Biological 1 Only    | abcf-1   | alimentary                                                       | 1                     |
| G4SRS5     | ABC Transporter, Mitochondrial                                                                                   | Biological 1 Only    | abtm-1   | alimentary, muscle, nervous                                      | 1                     |
| A6ZJ71     | Abnormal cell migration protein 38                                                                               | Biological 2 Only    | mig-38   | nervous, reproductive                                            | 1                     |
| G5EDM7     | Abnormal DAuer Formation DAF-5, a Ski oncogene homolog involved in a neuronal TGF beta pathway (71.0 kD) (Daf-5) | Biological 1 Only    | daf-5    | nervous                                                          | 1                     |
| P91156     | ACINus (Mammalian Apoptotic Chromatin condensation Inducer in the Nucleus) homolog                               | Biological 1 Only    | acin-1   | alimentary, epithelial, excretory, muscle, nervous, reproductive | 1                     |
| O45815     | ACTin                                                                                                            | Biological 1 Only    | act-5    | muscle                                                           | 6                     |
| P0DM41     | Actin-1                                                                                                          | Both                 | act-1    | alimentary, muscle, nervous                                      | 6                     |
| P10984     | Actin-2                                                                                                          | Both                 | act-2    | alimentary, muscle, nervous                                      | 6                     |
| G5EDW5     | ADAM (Disintegrin plus metalloprotease) family                                                                   | Biological 2 Only    | adm-2    | nervous, reproductive                                            | 1                     |
| Q7YSI9     | Adapter protein unc-53                                                                                           | Biological 1 Only    | unc-53   | alimentary, muscle                                               | 1                     |
| O45865     | Adenine Nucleotide Translocator                                                                                  | Biological 2 Only    | ant-1.1  | alimentary, nervous, reproductive                                | 4                     |
| P27604     | Adenosylhomocysteinase                                                                                           | Both                 | ahcy-1   | alimentary, nervous                                              | 3                     |
| O44510     | Adenylyltransferase and sulfurtransferase MOCS3                                                                  | Biological 2 Only    | moc-3    | reproductive                                                     | 1                     |

| UniProt ID | Protein names                                                          | Biological Replicate | Gene      | Body System                                                      | Peptides Modified No. |
|------------|------------------------------------------------------------------------|----------------------|-----------|------------------------------------------------------------------|-----------------------|
| G5EG68     | AGRin (Synaptic protein) homolog                                       | Biological 1 Only    | agr-1     | alimentary, nervous                                              | 1                     |
| Q19102     | Alcohol/Ribitol Dehydrogenase family                                   | Biological 2 Only    | ard-1     | alimentary, muscle                                               | 1                     |
| E0AHD3     | AMine oXidase family                                                   | Biological 1 Only    | amx-3     | alimentary, epithelial, excretory, muscle, nervous, reproductive | 1                     |
| A0A2C9C377 | AMP deaminase (EC 3.5.4.6)                                             | Biological 2 Only    | ampd-1    | alimentary, epithelial, excretory, muscle, nervous, reproductive | 1                     |
| G5EGB9     | Anion transporter ABTS-2                                               | Biological 2 Only    | abts-2    | alimentary, excretory                                            | 1                     |
| G5EBW3     | Anoctamin                                                              | Biological 2 Only    | anoh-1    | alimentary, muscle                                               | 1                     |
| O16637     | AP-3 complex subunit delta                                             | Biological 2 Only    | apd-3     | alimentary, epithelial, excretory, muscle, nervous, reproductive | 1                     |
| Q9XXH8     | Arf-GAP with ANK repeat and PH domain-containing protein cnt-1         | Biological 1 Only    | cnt-1     | nervous                                                          | 1                     |
| A0A2K5ATU7 | Aspartyl aminopeptidase                                                | Biological 2 Only    | dnpp-1    | alimentary, excretory                                            | 1                     |
| Q9XW25     | AT hook Transcription Factor family                                    | Biological 2 Only    | attf-6    | alimentary, epithelial, excretory, muscle, nervous, reproductive | 1                     |
| G5ED29     | Ataxin-2 homolog                                                       | Biological 2 Only    | atx-2     | nervous                                                          | 2                     |
| Q966L9     | ATP-dependent RNA helicase glh-2                                       | Biological 2 Only    | glh-2     | nervous, reproductive                                            | 1                     |
| O02326     | AT-rich interactive domain-containing protein cfi-1                    | Biological 2 Only    | cfi-1     | alimentary, muscle, nervous                                      | 2                     |
| O44739     | BAG family molecular chaperone regulator 1                             | Biological 2 Only    | bag-1     | nervous                                                          | 1                     |
| O16779     | Bestrophin homolog                                                     | Biological 2 Only    | best-19   | alimentary, epithelial, excretory, muscle, nervous, reproductive | 1                     |
| Q95Q18     | Beta-lactamase-like protein 2 homolog                                  | Biological 2 Only    | Y53F4B.39 | alimentary, epithelial, excretory, muscle, nervous, reproductive | 1                     |
| O01658     | Bifunctional lysine-specific demethylase and histidyl-hydroxylase NO66 | Biological 2 Only    | jmjc-1    | alimentary, muscle                                               | 1                     |
| O01904     | BLIstered cuticle                                                      | Biological 1 Only    | bli-2     | epithelial                                                       | 4                     |

| UniProt ID | Protein names                                                 | Biological Replicate | Gene    | Body System                                                      | Peptides Modified No. |
|------------|---------------------------------------------------------------|----------------------|---------|------------------------------------------------------------------|-----------------------|
| G5EF07     | BTAF (TBP-associated factor) homolog                          | Biological 2 Only    | btf-1   | alimentary, epithelial, excretory, muscle, nervous, reproductive | 1                     |
| Q9NF14     | BTB and MATH domain-containing protein 40                     | Biological 1 Only    | bath-40 | alimentary, muscle, nervous                                      | 1                     |
| Q9N2V1     | C. Elegans Homeobox                                           | Biological 1 Only    | ceh-76  | alimentary, muscle                                               | 1                     |
| Q86DC2     | C. Elegans Homeobox                                           | Biological 2 Only    | ceh-93  | alimentary, muscle                                               | 1                     |
| Q7YWV8     | C.elegans orthologue of yeast OligoSaccharylTransFerase Ost4p | Biological 2 Only    | ostf-4  | alimentary, epithelial, excretory, muscle, nervous, reproductive | 1                     |
| U4PM66     | CaDHerin family                                               | Biological 2 Only    | cdh-8   | alimentary, epithelial                                           | 2                     |
| G5EEK8     | Calcium-transporting ATPase                                   | Biological 2 Only    | sca-1   | alimentary, epithelial, excretory, muscle, nervous, reproductive | 1                     |
| Q9TYP9     | Calcium-transporting ATPase                                   | Biological 1 Only    | mca-2   | alimentary, muscle, nervous                                      | 1                     |
| Q23008     | Carboxylic ester hydrolase                                    | Biological 2 Only    | K11G9.3 | epithelial, nervous, reproductive                                | 1                     |
| P50140     | Chaperonin homolog Hsp-60, mitochondrial                      | Biological 1 Only    | hsp-60  | alimentary, epithelial, excretory, muscle, nervous, reproductive | 6                     |
| G5EFI9     | Checkpoint protein                                            | Biological 2 Only    | hus-1   | alimentary, epithelial, excretory, muscle, nervous, reproductive | 1                     |
| Q9XU76     | CHItinase-Like                                                | Biological 2 Only    | chil-12 | alimentary, epithelial, excretory, muscle, nervous, reproductive | 1                     |
|            | CHItinase-Like                                                | Biological 2 Only    | chil-16 | alimentary, epithelial, excretory, muscle, nervous, reproductive | 1                     |
| Q17835     | CHItinase-Like                                                | Both                 | chil-5  | nervous                                                          | 1                     |
| Q9GZF3     | Choline Kinase B                                              | Biological 2 Only    | ckb-4   | nervous                                                          | 1                     |
| Q9TYL9     | Coatomer subunit beta                                         | Biological 2 Only    | copb-1  | nervous                                                          | 1                     |
| O44174     | COLlagen                                                      | Biological 2 Only    | col-104 | muscle, nervous                                                  | 1                     |
| G5EDG6     | COLlagen                                                      | Biological 1 Only    | col-117 | muscle, nervous                                                  | 1                     |

| UniProt ID | Protein names                                    | Biological Replicate | Gene      | Body System                                                      | Peptides Modified No. |
|------------|--------------------------------------------------|----------------------|-----------|------------------------------------------------------------------|-----------------------|
| A3QM98     | COLlagen                                         | Biological 1 Only    | col-138   | muscle, nervous                                                  | 6                     |
| Q20270     | COLlagen                                         | Biological 2 Only    | col-173   | muscle, nervous                                                  | 1                     |
| Q18480     | COLlagen                                         | Both                 | col-175   | muscle, nervous                                                  | 2                     |
| Q9N3D7     | COLlagen                                         | Biological 1 Only    | col-48    | muscle, nervous                                                  | 1                     |
| O44989     | COLlagen                                         | Both                 | col-49    | muscle, nervous                                                  | 3                     |
| Q94399     | COLlagen                                         | Biological 1 Only    | col-63    | muscle, nervous                                                  | 4                     |
| Q9N4U2     | COLlagen                                         | Biological 1 Only    | col-71    | muscle, nervous                                                  | 2                     |
| P17139     | Collagen alpha-1(IV) chain                       | Biological 2 Only    | emb-9     | muscle, nervous                                                  | 10                    |
| P17140     | Collagen alpha-2(IV) chain                       | Biological 1 Only    | let-2     | muscle, nervous                                                  | 5                     |
| Q9N425     | COP9 signalosome complex subunit 3               | Biological 2 Only    | csn-3     | nervous                                                          | 1                     |
| Q17423     | Crescerin-like protein che-12                    | Biological 2 Only    | che-12    | nervous                                                          | 1                     |
| Q93781     | CSB (Cockayne Syndrome B) homolog                | Biological 1 Only    | csb-1     | muscle, nervous                                                  | 1                     |
| G5EC98     | CTP synthase                                     | Biological 2 Only    | ctps-1    | alimentary                                                       | 1                     |
| Q09457     | Cuticle collagen bli-1                           | Biological 2 Only    | bli-1     | epithelial, muscle, nervous                                      | 3                     |
| P35800     | Cuticle collagen dpy-10                          | Both                 | dpy-10    | epithelial, muscle                                               | 2                     |
| Q23628     | Cuticle collagen lon-3                           | Biological 2 Only    | lon-3     | epithelial, muscle                                               | 2                     |
| P12114     | Cuticle collagen sqt-1                           | Biological 1 Only    | sqt-1     | epithelial, muscle                                               | 6                     |
| Q9TZE2     | CUTiclin-Like                                    | Biological 2 Only    | cutl-13   | epithelial                                                       | 1                     |
| Q9XXI7     | CYclophylin                                      | Biological 2 Only    | cyn-16    | nervous                                                          | 1                     |
| Q09500     | Cystinosin homolog                               | Biological 2 Only    | ctns-1    | nervous                                                          | 1                     |
| P90849     | Cytochrome OXidase assembly protein              | Biological 2 Only    | cox-5b    | muscle, nervous                                                  | 1                     |
| G5ED86     | CYtochrome P450 family                           | Biological 2 Only    | cyp-14a4  | muscle, nervous                                                  | 1                     |
| Q9XX57     | DAF-16/FOXO Controlled, germline Tumor affecting | Both                 | dct-16    | nervous                                                          | 1                     |
| Q23262     | Dauer or Aging adult Overexpression              | Biological 2 Only    | dao-4     | nervous                                                          | 1                     |
| Q7JLY2     | Dauer Up-Regulated                               | Biological 2 Only    | dur-1     | nervous                                                          | 1                     |
| G5EG13     | DeHydrogenases, Short chain                      | Biological 2 Only    | dhs-12    | muscle                                                           | 2                     |
| Q9NAH4     | Density-regulated protein homolog                | Biological 2 Only    | Y47D3A.21 | alimentary, nervous                                              | 1                     |
| G5EET2     | DeoxyUTPase                                      | Biological 1 Only    | dut-1     | alimentary, epithelial, excretory, muscle, nervous, reproductive | 1                     |
| H2KZK7     | Dipeptidyl Peptidase Four (IV) family            | Biological 2 Only    | dpf-3     | nervous                                                          | 1                     |

| UniProt ID | Protein names                                                          | Biological Replicate | Gene         | Body System                                                      | Peptides Modified No. |
|------------|------------------------------------------------------------------------|----------------------|--------------|------------------------------------------------------------------|-----------------------|
| G5EFD9     | Disintegrin and metalloproteinase domain-containing protein 10 homolog | Biological 2 Only    | sup-17       | nervous, reproductive                                            | 1                     |
| Q18066     | Disorganized muscle protein 1                                          | Biological 2 Only    | dim-1        | muscle, nervous                                                  | 2                     |
| O17966     | DNA topoisomerase 1                                                    | Biological 1 Only    | top-1        | alimentary, epithelial, excretory, muscle, nervous, reproductive | 1                     |
| Q23670     | DNA topoisomerase 2 top-2                                              | Biological 1 Only    | top-2        | alimentary, epithelial, excretory, muscle, nervous, reproductive | 1                     |
| Q8MPX3     | DnaJ homolog dnj-20                                                    | Biological 1 Only    | dnj-20       | alimentary                                                       | 1                     |
| O61213     | Dual oxidase 1                                                         | Biological 2 Only    | bli-3        | epithelial, muscle, nervous                                      | 2                     |
| Q18345     | DumPY: shorter than wild-type                                          | Biological 1 Only    | dpy-8        | muscle, nervous                                                  | 2                     |
| O62432     | DumPY: shorter than wild-type                                          | Both                 | dpy-4        | nervous                                                          | 5                     |
| E2JKZ0     | DyNactin Complex component                                             | Biological 1 Only    | dnc-1        | alimentary, epithelial, excretory, muscle, nervous, reproductive | 1                     |
| G5EDV4     | Dynein Heavy Chain                                                     | Both                 | dhc-3        | alimentary, nervous                                              | 1                     |
| Q94361     | E3 SUMO-protein ligase gei-17                                          | Biological 2 Only    | gei-17       | muscle, nervous                                                  | 1                     |
| Q9BIF4     | EHS-1                                                                  | Biological 2 Only    | ehs-1        | nervous, reproductive                                            | 1                     |
| P53013     | Elongation factor 1-alpha                                              | Biological 1 Only    | eft-3; eft-4 | alimentary, muscle                                               | 5                     |
| Q9XV52     | Elongation factor G, mitochondrial                                     | Biological 2 Only    | gfm-1        | alimentary, epithelial, excretory, muscle, nervous, reproductive | 1                     |
| Q20819     | Elongation factor Ts, mitochondrial                                    | Biological 1 Only    | tsfm-1       | alimentary, epithelial, excretory, muscle, nervous, reproductive | 1                     |
| O45146     | Embryonic mRNA (mRNA) Anterior                                         | Biological 1 Only    | era-1        | alimentary, epithelial, excretory, muscle, nervous, reproductive | 1                     |
| P20163     | Endoplasmic reticulum chaperone BiP homolog                            | Biological 1 Only    | hsp-4        | alimentary, epithelial                                           | 3                     |
| U4PBY0     | Enhancer of EfL-1 mutant phenotype                                     | Biological 1 Only    | eel-1        | reproductive                                                     | 1                     |
| O61460     | Ephrin receptor 1                                                      | Biological 1 Only    | vab-1        | alimentary, excretory, muscle, nervous                           | 1                     |

| UniProt ID | Protein names                                              | Biological Replicate | Gene    | Body System                                                      | Peptides Modified No. |
|------------|------------------------------------------------------------|----------------------|---------|------------------------------------------------------------------|-----------------------|
| G5EDE8     | ERGIC-53-like protein                                      | Biological 1 Only    | ile-1   | alimentary, nervous                                              | 1                     |
| O62108     | Eukaryotic Elongation Factor, SelenoCysteine-tRNA-specific | Biological 1 Only    | efsc-1  | nervous                                                          | 1                     |
| O02328     | Eukaryotic translation initiation factor 3 subunit C       | Biological 1 Only    | eif-3.C | alimentary, nervous                                              | 1                     |
| P34563     | Eukaryotic translation initiation factor 5A-1              | Both                 | iff-1   | reproductive                                                     | 1                     |
| Q20751     | Eukaryotic translation initiation factor 5A-2              | Both                 | iff-2   | nervous, reproductive                                            | 1                     |
| G5EGT7     | Eukaryotic translation initiation factor eIF5B             | Biological 2 Only    | iffb-1  | alimentary, epithelial, excretory, muscle, nervous, reproductive | 1                     |
| G5EET6     | Exchange factor for Arf-6                                  | Biological 2 Only    | efa-6   | nervous                                                          | 1                     |
| Q23089     | EXPORTin (Nuclear export receptor)                         | Biological 2 Only    | xpo-1   | nervous                                                          | 1                     |
| Q20121     | Fatty Acid CoA Synthetase family                           | Biological 2 Only    | acs-4   | alimentary, epithelial, excretory, muscle, nervous, reproductive | 1                     |
| P91871     | Fatty Acid SyNthase                                        | Biological 1 Only    | fasn-1  | nervous, reproductive                                            | 4                     |
| P34382     | Fatty-acid and retinol-binding protein 1                   | Biological 1 Only    | far-1   | nervous, reproductive                                            | 1                     |
| O76692     | F-box B protein                                            | Biological 1 Only    | fbxb-82 | alimentary, nervous                                              | 1                     |
| O44475     | F-box B protein                                            | Biological 1 Only    | fbxb-78 | muscle, nervous                                                  | 1                     |
| P91446     | F-box C protein                                            | Biological 1 Only    | fbxc-49 | alimentary, nervous                                              | 1                     |
| O16541     | F-box C protein                                            | Biological 1 Only    | fbxc-50 | alimentary, nervous                                              | 1                     |
| O17905     | FERM domain (Protein4.1-ezrin-radixin-moesin) family       | Biological 2 Only    | frm-3   | nervous                                                          | 1                     |
| U4PBJ9     | FiLamiN (Actin binding protein) homolog                    | Biological 1 Only    | fln-1   | nervous, reproductive                                            | 2                     |
| A0A0K3AST3 | FMRF-Like Peptide                                          | Biological 2 Only    | flp-34  | nervous                                                          | 1                     |
| P54216     | Fructose-bisphosphate aldolase 1                           | Biological 1 Only    | aldo-1  | muscle, nervous                                                  | 2                     |
| Q18625     | Galectin                                                   | Biological 2 Only    | lec-4   | nervous                                                          | 1                     |
| O44499     | General Transcription Factor homolog                       | Biological 1 Only    | gtf-2h1 | alimentary                                                       | 1                     |
| G4SI07     | GEX Interacting protein                                    | Biological 2 Only    | gei-15  | muscle, nervous                                                  | 1                     |
| Q20826     | GLIoTactin (Drosophila neuroligin-like) homolog            | Biological 2 Only    | glit-1  | nervous                                                          | 1                     |
| A0A0K3AT43 | GLoBin related                                             | Biological 1 Only    | glb-33  | muscle, nervous                                                  | 1                     |
| Q18086     | Globin-like protein 6                                      | Biological 2 Only    | glb-6   | muscle, nervous                                                  | 1                     |

| UniProt ID | Protein names                                               | Biological Replicate | Gene    | Body System                                                      | Peptides Modified No. |
|------------|-------------------------------------------------------------|----------------------|---------|------------------------------------------------------------------|-----------------------|
| Q8T7Z3     | Glutathione S-Transferase                                   | Biological 2 Only    | gst-35  | muscle                                                           | 1                     |
| Q19459     | Golgi apparatus protein 1 homolog                           | Biological 2 Only    | F14E5.2 | alimentary, muscle                                               | 1                     |
| Q19989     | GOLGI associated coiled-coil protein homolog                | Biological 1 Only    | golg-2  | alimentary, nervous                                              | 1                     |
| Q22422     | Gon-2 Extragenic Modifier                                   | Biological 1 Only    | gem-4   | alimentary, nervous                                              | 1                     |
| H1ZUV8     | GTPase-activating protein pac-1                             | Biological 1 Only    | pac-1   | muscle                                                           | 1                     |
| Q09417     | Guanine nucleotide exchange factor subunit R06F6.8          | Biological 1 Only    | R06F6.8 | alimentary, nervous                                              | 1                     |
| Q23553     | GUstatory Receptor family                                   | Biological 1 Only    | gur-5   | alimentary, nervous                                              | 2                     |
| G5EC23     | HCF1 related                                                | Biological 2 Only    | hcf-1   | nervous, reproductive                                            | 1                     |
| P09446     | Heat shock 70 kDa protein A                                 | Biological 2 Only    | hsp-1   | alimentary, excretory, muscle                                    | 3                     |
| Q05036     | Heat shock protein 110                                      | Both                 | hsp-110 | alimentary, excretory, muscle                                    | 3                     |
| Q18688     | Heat shock protein 90 (Abnormal dauer formation protein 21) | Biological 2 Only    | daf-21  | alimentary                                                       | 1                     |
| F0IWT2     | Heavy chain, Unconventional Myosin                          | Biological 2 Only    | hum-7   | muscle, nervous                                                  | 1                     |
| G5EFD4     | Heavy Metal Tolerance factor                                | Biological 1 Only    | hmt-1   | alimentary, nervous                                              | 1                     |
| Q9TZK5     | Heparan SulphoTransferase                                   | Biological 2 Only    | hst-3.1 | alimentary, epithelial, excretory, muscle, nervous, reproductive | 1                     |
| A0A1I6CM66 | Heterodimeric GTPase Activating Protein subunit             | Biological 2 Only    | hgap-2  | alimentary, epithelial, excretory, muscle, nervous, reproductive | 1                     |
| Q27894     | Histone H2B 2                                               | Biological 2 Only    | his-4   | alimentary, epithelial                                           | 1                     |
| K7ZUH9     | Histone H3                                                  | Biological 1 Only    | his-40  | alimentary, muscle                                               | 1                     |
| G5EFV4     | HMG (High mobility group protein 1.1)                       | Biological 2 Only    | hmg-1.1 | alimentary, muscle, nervous                                      | 1                     |
| O76447     | HoloCentric chromosome binding Protein                      | Biological 2 Only    | hcp-1   | nervous                                                          | 1                     |
| Q23175     | Homeobox protein ceh-32                                     | Biological 2 Only    | ceh-32  | epithelial, nervous, reproductive                                | 1                     |
| G5EE04     | Hsp-70 Interacting Protein homolog                          | Both                 | hip-1   | alimentary, nervous                                              | 2                     |
| Q22040     | ImmunoGlobulin-like Cell adhesion Molecule family           | Biological 1 Only    | igcm-2  | alimentary, muscle, nervous                                      | 1                     |
| Q9N5V3     | IMportin Beta family                                        | Biological 1 Only    | imb-3   | alimentary, nervous                                              | 3                     |



| UniProt ID | Protein names                                                            | Biological Replicate | Gene     | Body System                                                      | Peptides Modified No. |
|------------|--------------------------------------------------------------------------|----------------------|----------|------------------------------------------------------------------|-----------------------|
| O01634     | Innexin-12                                                               | Biological 2 Only    | inx-12   | epithelial, nervous, reproductive                                | 1                     |
| P91309     | Inositol hexakisphosphate and diphosphoinositol-pentakisphosphate kinase | Biological 2 Only    | F46F11.1 | alimentary, epithelial, excretory, muscle, nervous, reproductive | 1                     |
| A0A0M7REB7 | Insulin/EGF-Receptor L Domain protein                                    | Biological 2 Only    | irlD-32  | nervous                                                          | 1                     |
| H2L0E3     | Insulin/EGF-Receptor L Domain protein                                    | Biological 2 Only    | irlD-45  | nervous                                                          | 1                     |
| P34446     | Integrin alpha pat-2                                                     | Biological 2 Only    | pat-2    | muscle, nervous                                                  | 1                     |
| Q20330     | Intermediate Filament Organize                                           | Biological 2 Only    | ifo-1    | nervous, reproductive                                            | 1                     |
| P90901     | Intermediate filament protein ifa-1                                      | Biological 2 Only    | ifa-1    | nervous, reproductive                                            | 2                     |
| O02365     | Intermediate filament protein ifa-2                                      | Biological 1 Only    | mua-6    | alimentary, muscle                                               | 3                     |
| Q19289     | Intermediate filament protein ifb-1                                      | Both                 | ifb-1    | epithelial, muscle                                               | 1                     |
| Q19698     | Invertebrate LYsozyme                                                    | Biological 2 Only    | ilys-5   | alimentary, nervous                                              | 1                     |
| O76357     | Invertebrate-type lysozyme 3                                             | Biological 2 Only    | ilys-3   | alimentary, nervous                                              | 1                     |
| Q95YD8     | Isocitrate dehydrogenase [NAD] subunit, mitochondrial                    | Biological 2 Only    | idhg-2   | alimentary, muscle, nervous                                      | 1                     |
| Q21926     | Isoleucine--tRNA ligase, cytoplasmic                                     | Biological 1 Only    | iars-1   | alimentary, nervous                                              | 1                     |
| Q8WQC4     | KELch-repeat containing protein                                          | Biological 2 Only    | kel-3    | alimentary, nervous                                              | 1                     |
| Q9XU12     | Kinesin-like protein                                                     | Biological 2 Only    | klp-7    | alimentary, epithelial, excretory, muscle, nervous, reproductive | 1                     |
| P45962     | Kinesin-like protein klp-3                                               | Biological 1 Only    | klp-3    | alimentary, muscle, nervous                                      | 1                     |
| Q20849     | Kinetochores-associated protein rod-1                                    | Biological 2 Only    | rod-1    | excretory, nervous                                               | 2                     |
| Q21443     | Lamin-1                                                                  | Biological 2 Only    | lmn-1    | alimentary, epithelial, excretory, muscle, nervous, reproductive | 1                     |
| O44565     | LAMinin related                                                          | Biological 1 Only    | lam-1    | alimentary, muscle, nervous                                      | 1                     |
| G5ECE3     | LAMinin related                                                          | Biological 2 Only    | lam-3    | muscle                                                           | 2                     |
| Q9TZD0     | Lateral signaling target protein 2                                       | Biological 2 Only    | lst-2    | epithelial, reproductive                                         | 1                     |
| Q23164     | LiPocalin-Related protein                                                | Biological 1 Only    | lpr-4    | alimentary, muscle, nervous                                      | 1                     |
| G5EEA2     | LiPocalin-Related protein                                                | Biological 1 Only    | lpr-3    | alimentary, nervous                                              | 2                     |

| UniProt ID | Protein names                                                  | Biological Replicate | Gene     | Body System                                                      | Peptides Modified No. |
|------------|----------------------------------------------------------------|----------------------|----------|------------------------------------------------------------------|-----------------------|
| Q18695     | LMBR1 domain-containing protein 2 homolog                      | Biological 2 Only    | C47G2.4  | alimentary, epithelial, excretory, muscle, nervous, reproductive | 1                     |
| O18188     | MAEA (MAcrophage Erythroblast Attacher protein) homolog        | Biological 2 Only    | maea-1   | alimentary, epithelial, excretory, muscle, nervous, reproductive | 1                     |
| Q9U2A7     | Major sperm protein                                            | Biological 2 Only    | Y48B6A.5 | reproductive                                                     | 1                     |
| Q2V074     | MATH (Meprin-associated Traf homology) domain containing       | Biological 1 Only    | math-4   | alimentary, nervous                                              | 1                     |
| Q9N575     | MEiosis-to-MItosis transition associated                       | Biological 2 Only    | memi-1   | reproductive                                                     | 1                     |
| G5EG10     | Metabotropic GLutamate receptor family                         | Biological 2 Only    | mgl-2    | alimentary, epithelial, excretory, muscle, nervous, reproductive | 2                     |
| O45319     | Mitochondrial import inner membrane translocase subunit tim-13 | Biological 1 Only    | tin-13   | alimentary, muscle, reproductive                                 | 2                     |
| Q18090     | Mitochondrial import receptor subunit TOM40 homolog            | Biological 1 Only    | tomm-40  | alimentary, excretory, muscle, nervous                           | 2                     |
| G5EC18     | Mitochondrial phenylalanyl-tRNA synthetase                     | Biological 2 Only    | fars-2   | nervous, reproductive                                            | 1                     |
| Q21029     | Mitogen-activated protein kinase kinase kinase nsy-1           | Biological 1 Only    | nsy-1    | alimentary, epithelial                                           | 1                     |
| Q9BKU8     | MOdifier of protein AGgregation                                | Biological 1 Only    | moag-4   | alimentary, nervous, reproductive                                | 1                     |
| Q9TXV1     | Multiple PDZ domain protein                                    | Biological 1 Only    | mpz-4    | alimentary, nervous                                              | 1                     |
| O01761     | Muscle M-line assembly protein unc-89                          | Biological 2 Only    | unc-89   | alimentary, epithelial, excretory, muscle, nervous, reproductive | 3                     |
| Q21000     | MYOsin heavy chain structural genes                            | Biological 1 Only    | myo-5    | alimentary, nervous                                              | 3                     |
| P19625     | Myosin regulatory light chain 1                                | Biological 2 Only    | mlc-1    | alimentary, epithelial, excretory, muscle, nervous, reproductive | 2                     |
| P19626     | Myosin regulatory light chain 2                                | Biological 2 Only    | mlc-2    | alimentary, epithelial, excretory, muscle, nervous, reproductive | 1                     |
| P02567     | Myosin-1                                                       | Biological 2 Only    | myo-1    | muscle                                                           | 1                     |

| UniProt ID | Protein names                                        | Biological Replicate | Gene    | Body System                                                      | Peptides Modified No. |
|------------|------------------------------------------------------|----------------------|---------|------------------------------------------------------------------|-----------------------|
| P12845     | Myosin-2                                             | Biological 1 Only    | myo-2   | alimentary, nervous                                              | 2                     |
| P12844     | Myosin-3                                             | Both                 | myo-3   | muscle, reproductive                                             | 7                     |
| P02566     | Myosin-4                                             | Biological 2 Only    | unc-54  | muscle                                                           | 2                     |
| G5EF08     | Na/Ca eXchangers                                     | Biological 1 Only    | ncx-1   | alimentary, muscle, nervous                                      | 2                     |
| Q86S66     | Nascent polypeptide-associated complex subunit alpha | Biological 2 Only    | icd-2   | alimentary, epithelial, excretory, muscle, nervous, reproductive | 2                     |
| G5EF32     | Nematode Polyprotein Allergen related                | Biological 2 Only    | npa-1   | alimentary, epithelial, excretory, muscle, nervous, reproductive | 4                     |
| O17972     | Nephrocystin-1-like protein                          | Biological 1 Only    | nph-1   | muscle, nervous                                                  | 1                     |
| Q9U2T1     | NEPrilysin metallopeptidase family                   | Biological 1 Only    | nep-23  | alimentary, nervous                                              | 1                     |
| G5EED7     | Neuroigin-1                                          | Biological 2 Only    | nlg-1   | nervous                                                          | 1                     |
| Q17698     | Neuropeptide-Like Protein                            | Biological 2 Only    | nlp-77  | alimentary, epithelial, nervous                                  | 3                     |
| A5JYX8     | Nicalin                                              | Biological 2 Only    | nra-2   | nervous                                                          | 1                     |
| Q20641     | Non-muscle MYosin                                    | Biological 2 Only    | nmy-1   | muscle, nervous                                                  | 2                     |
| Q9N4M4     | Nuclear anchorage protein 1                          | Both                 | anc-1   | nervous                                                          | 2                     |
| O16398     | Nuclear Hormone Receptor family                      | Biological 1 Only    | nhr-156 | alimentary, muscle                                               | 1                     |
| Q86G90     | Nuclear Pore complex Protein                         | Biological 2 Only    | npp-9   | alimentary, epithelial, excretory, muscle, nervous, reproductive | 1                     |
| Q9XVS7     | Nuclear RNA export factor 1                          | Biological 2 Only    | nxf-1   | alimentary, muscle                                               | 1                     |
| Q8MQ51     | NUCleoBindin homolog                                 | Biological 1 Only    | nucb-1  | alimentary, muscle, nervous                                      | 2                     |
| O45012     | NucleOLar protein                                    | Biological 1 Only    | nol-58  | alimentary, muscle, nervous                                      | 2                     |
| Q93576     | Nucleoside diphosphate kinase                        | Both                 | ndk-1   | alimentary, epithelial, excretory, muscle, nervous, reproductive | 4                     |
| G5EBV8     | Olfactory channel                                    | Biological 2 Only    | osm-9   | alimentary, nervous                                              | 1                     |
| G5EF37     | Paralysed Arrest at Two-fold                         | Biological 2 Only    | pat-10  | alimentary, epithelial, excretory, muscle, nervous, reproductive | 3                     |

| UniProt ID | Protein names                                                        | Biological Replicate | Gene    | Body System                                                      | Peptides Modified No. |
|------------|----------------------------------------------------------------------|----------------------|---------|------------------------------------------------------------------|-----------------------|
| P10567     | Paramyosin                                                           | Both                 | unc-15  | epithelial, muscle, reproductive                                 | 7                     |
| Q9NA76     | PARN (Poly(A)-specific RiboNuclease) homolog                         | Biological 2 Only    | parn-2  | reproductive                                                     | 1                     |
| P52011     | Peptidyl-prolyl cis-trans isomerase 3                                | Biological 2 Only    | cyn-3   | excretory                                                        | 1                     |
| P52015     | Peptidyl-prolyl cis-trans isomerase 7                                | Biological 1 Only    | cyn-7   | alimentary, nervous, reproductive                                | 1                     |
| Q9U2Q8     | Peptidylprolyl isomerase                                             | Biological 2 Only    | fkf-2   | alimentary, muscle, nervous                                      | 1                     |
| Q17645     | p-GlycoProtein related                                               | Biological 1 Only    | pgp-5   | alimentary, muscle, nervous                                      | 1                     |
| Q22656     | p-GlycoProtein related                                               | Biological 1 Only    | pgp-6   | alimentary, nervous                                              | 1                     |
| G5EG58     | p-GlycoProtein related                                               | Biological 2 Only    | pgp-9   | alimentary, nervous                                              | 1                     |
| G5ECU3     | Phosphate carrier protein, mitochondrial                             | Biological 2 Only    | F01G4.6 | alimentary, muscle                                               | 1                     |
| Q9XWB7     | Phosphoinositide phospholipase C                                     | Biological 2 Only    | plc-2   | alimentary, epithelial, excretory, muscle, nervous, reproductive | 1                     |
| G5EDU3     | Phospholipase                                                        | Biological 2 Only    | pld-1   | alimentary, muscle, nervous                                      | 1                     |
| U4PRY7     | PLeXin                                                               | Biological 2 Only    | plx-1   | alimentary, muscle, reproductive                                 | 2                     |
| Q9U302     | Polyadenylate-binding protein                                        | Biological 2 Only    | pab-1   | alimentary                                                       | 3                     |
| C7IVR4     | Polyglutamine-repeat protein pqn-41                                  | Biological 2 Only    | pqn-41  | alimentary, epithelial, nervous                                  | 1                     |
| Q9XWG9     | Potassium channel, KvQLT family                                      | Biological 1 Only    | kqt-3   | alimentary, nervous                                              | 1                     |
| Q10046     | Potential vesicular glutamate transporter vglu-3                     | Biological 1 Only    | vglu-3  | alimentary, muscle, nervous                                      | 1                     |
| Q10454     | Probable arginine kinase F46H5.3                                     | Biological 2 Only    | F46H5.3 | muscle                                                           | 2                     |
| P34574     | Probable clathrin heavy chain 1                                      | Biological 2 Only    | chc-1   | muscle                                                           | 1                     |
| Q09236     | Probable coatamer subunit delta                                      | Biological 1 Only    | copd-1  | muscle                                                           | 2                     |
| Q09248     | Probable dynactin subunit 2                                          | Biological 2 Only    | dnc-2   | nervous                                                          | 2                     |
| Q93615     | Probable electron transfer flavoprotein subunit alpha, mitochondrial | Biological 1 Only    | F27D4.1 | alimentary                                                       | 1                     |
| Q27484     | Probable histone H2B 3                                               | Biological 2 Only    | his-41  | alimentary                                                       | 1                     |

| UniProt ID | Protein names                                                           | Biological Replicate | Gene    | Body System                                                      | Peptides Modified No. |
|------------|-------------------------------------------------------------------------|----------------------|---------|------------------------------------------------------------------|-----------------------|
| O44757     | Probable histone-lysine N-methyltransferase lin-59                      | Biological 2 Only    | lin-59  | alimentary, epithelial, excretory, muscle, nervous, reproductive | 1                     |
| Q22347     | Probable medium-chain specific acyl-CoA dehydrogenase 10, mitochondrial | Biological 2 Only    | acdH-10 | epithelial, alimentary                                           | 1                     |
| P91427     | Probable phosphoglycerate kinase                                        | Biological 1 Only    | pgk-1   | muscle                                                           | 2                     |
| Q09530     | Probable pre-mRNA-splicing factor ATP-dependent RNA helicase mog-5      | Biological 1 Only    | mog-5   | reproductive, nervous                                            | 1                     |
| O17680     | Probable S-adenosylmethionine synthase 1                                | Biological 1 Only    | sams-1  | alimentary, muscle, nervous, reproductive                        | 1                     |
| Q9N4G9     | Probable small nuclear ribonucleoprotein G                              | Biological 2 Only    | snr-7   | alimentary, epithelial, excretory, muscle, nervous, reproductive | 2                     |
| Q17848     | Probable type I inositol 1,4,5-trisphosphate 5-phosphatase              | Biological 2 Only    | ipp-5   | alimentary, epithelial, excretory, muscle, nervous, reproductive | 1                     |
| Q23680     | Probable V-type proton ATPase subunit F                                 | Biological 1 Only    | vha-9   | alimentary, muscle, reproductive                                 | 1                     |
| P91303     | Probable V-type proton ATPase subunit G                                 | Biological 2 Only    | vha-10  | nervous                                                          | 1                     |
| Q22494     | Probable V-type proton ATPase subunit H 2                               | Both                 | vha-15  | alimentary, muscle, nervous                                      | 2                     |
| Q19842     | Propionyl-CoA carboxylase alpha chain, mitochondrial                    | Biological 2 Only    | pcca-1  | alimentary, muscle, nervous                                      | 1                     |
| O44156     | Proteasome subunit alpha type-1                                         | Biological 1 Only    | pas-6   | reproductive                                                     | 2                     |
| V6CJ04     | Protein bicaudal D homolog                                              | Biological 1 Only    | bicd-1  | excretory, muscle, nervous, reproductive                         | 1                     |
| Q17469     | Protein containing ALS2cr12 (ALS2CR12) signature                        | Biological 2 Only    | pals-27 | alimentary, epithelial, excretory, muscle, nervous, reproductive | 1                     |
| P13508     | Protein glp-1                                                           | Biological 1 Only    | glp-1   | nervous                                                          | 1                     |
| O17237     | Protein melted homolog                                                  | Biological 2 Only    | K10B4.3 | alimentary, epithelial, excretory, muscle, nervous, reproductive | 1                     |
| P37806     | Protein unc-87                                                          | Biological 2 Only    | unc-87  | muscle                                                           | 1                     |

| UniProt ID | Protein names                                                   | Biological Replicate | Gene     | Body System                                                      | Peptides Modified No. |
|------------|-----------------------------------------------------------------|----------------------|----------|------------------------------------------------------------------|-----------------------|
| G5EET8     | Protein Up-regulated in Daf-2(Gf)                               | Biological 2 Only    | pud-1.2  | alimentary, epithelial, excretory, muscle, nervous, reproductive | 1                     |
| C6KRN3     | Protein YIPF                                                    | Biological 2 Only    | W02D9.2  | alimentary, epithelial, excretory, muscle, nervous, reproductive | 1                     |
| Q09622     | Pumilio domain-containing protein 12                            | Biological 2 Only    | puf-12   | alimentary, epithelial, excretory, muscle, nervous, reproductive | 1                     |
| Q93425     | Putative 28S ribosomal protein S5, mitochondrial                | Biological 2 Only    | mrps-5   | reproductive                                                     | 1                     |
| Q21565     | Putative ammonium transporter 3                                 | Biological 2 Only    | amt-3    | alimentary, nervous                                              | 1                     |
| Q17426     | Putative pseudouridine synthase                                 | Biological 2 Only    | B0024.11 | alimentary, nervous                                              | 1                     |
| Q17703     | Putative steroid dehydrogenase 1                                | Biological 2 Only    | stdh-1   | muscle, nervous                                                  | 1                     |
| O44451     | Pyruvate dehydrogenase E1 component subunit beta, mitochondrial | Biological 1 Only    | pdhb-1   | alimentary, nervous                                              | 1                     |
| Q9UAAQ6    | RAB family                                                      | Biological 1 Only    | rab-1    | alimentary, muscle, reproductive                                 | 1                     |
| Q2V4S2     | Rab GDP dissociation inhibitor                                  | Biological 2 Only    | gdi-1    | alimentary, muscle, nervous                                      | 1                     |
| J7S122     | RaBConnectin related                                            | Biological 1 Only    | rbc-1    | alimentary, nervous                                              | 1                     |
| Q9BL05     | RaBConnectin related                                            | Both                 | rbc-2    | alimentary, nervous                                              | 1                     |
| Q9XVI0     | RaL Binding Protein                                             | Biological 1 Only    | rlbp-1   | alimentary, nervous, reproductive                                | 1                     |
| G5ECC3     | Receptor Mediated Endocytosis                                   | Biological 2 Only    | rme-1    | alimentary                                                       | 1                     |
| P34891     | Receptor-like tyrosine-protein kinase kin-15                    | Biological 2 Only    | kin-15   | epithelial                                                       | 1                     |
| X5M8U1     | Receptor-type guanylate cyclase gcy-17                          | Biological 2 Only    | gcy-17   | nervous                                                          | 1                     |
| G5EFQ0     | Receptor-type guanylate cyclase gcy-18                          | Biological 1 Only    | gcy-18   | alimentary, nervous                                              | 1                     |
| Q10028     | Receptor-type guanylate cyclase gcy-3                           | Biological 2 Only    | gcy-3    | nervous                                                          | 1                     |
| G5EGJ5     | Receptor-type tyrosine-protein phosphatase-like ida-1           | Biological 2 Only    | ida-1    | nervous                                                          | 1                     |
| O16458     | Related to yeast Vacuolar Protein Sorting factor                | Biological 1 Only    | vps-60   | alimentary, nervous, reproductive                                | 1                     |

| UniProt ID | Protein names                                       | Biological Replicate | Gene    | Body System                                                      | Peptides Modified No. |
|------------|-----------------------------------------------------|----------------------|---------|------------------------------------------------------------------|-----------------------|
| Q21024     | Ribonuclease H1                                     | Biological 2 Only    | rnh-1.0 | alimentary, epithelial, nervous                                  | 1                     |
| A3QMC5     | Ribosomal Protein, Large subunit                    | Biological 1 Only    | rpl-34  | alimentary, epithelial, excretory, muscle, nervous, reproductive | 1                     |
| Q22716     | Ribosomal Protein, Large subunit                    | Biological 2 Only    | rpl-32  | alimentary, nervous                                              | 2                     |
| O18240     | Ribosomal Protein, Small subunit                    | Biological 1 Only    | rps-18  | alimentary, muscle, nervous, reproductive                        | 4                     |
| Q20206     | Ribosomal Protein, Small subunit                    | Biological 1 Only    | rps-11  | alimentary, muscle, nervous                                      | 1                     |
| O17218     | Ribosomal Protein, Small subunit                    | Biological 2 Only    | rps-22  | alimentary, nervous                                              | 1                     |
| Q1XFY9     | Ribosomal Protein, Small subunit                    | Biological 1 Only    | rps-24  | alimentary, nervous                                              | 2                     |
| O45713     | RNA Binding Motif protein homolog                   | Biological 2 Only    | rbm-3.2 | alimentary, epithelial, excretory, muscle, nervous, reproductive | 1                     |
| G5EE53     | RNA-dependent RNA polymerase Family                 | Biological 2 Only    | rff-3   | alimentary, excretory, nervous                                   | 1                     |
| Q9NA83     | ROLLER: helically twisted, animals roll when moving | Both                 | rol-1   | reproductive                                                     | 5                     |
| P46549     | Serine/threonine-protein kinase SULU                | Biological 2 Only    | kin-18  | alimentary, epithelial, excretory, nervous                       | 1                     |
| G5EC18     | Serine/threonine-protein phosphatase                | Biological 1 Only    | pph-1   | alimentary, muscle, nervous                                      | 1                     |
| Q9GUC2     | Serpentine Receptor, class H                        | Biological 1 Only    | srh-246 | alimentary, epithelial, excretory, muscle, nervous, reproductive | 1                     |
| Q22982     | Serpentine Receptor, class T                        | Biological 2 Only    | srt-35  | alimentary, nervous                                              | 1                     |
| H2L274     | Serpentine Receptor, class W                        | Biological 2 Only    | srw-62  | alimentary, epithelial, excretory, muscle, nervous, reproductive | 1                     |
| Q7KPX1     | Serpentine Receptor, class X                        | Biological 2 Only    | srx-14  | muscle, nervous                                                  | 1                     |
| Q93869     | Serpentine Receptor, class Z                        | Biological 2 Only    | srz-12  | alimentary                                                       | 1                     |
| Q966L5     | Serrate RNA effector molecule homolog               | Biological 1 Only    | E01A2.2 | epithelial, muscle, nervous                                      | 1                     |
| H9G2R4     | SLOWpoke potassium channel family                   | Biological 2 Only    | slo-2   | muscle, nervous                                                  | 1                     |

| UniProt ID | Protein names                                           | Biological Replicate | Gene   | Body System                                                      | Peptides Modified No. |
|------------|---------------------------------------------------------|----------------------|--------|------------------------------------------------------------------|-----------------------|
| G5EFV6     | Sodium/potassium-transporting ATPase subunit alpha      | Biological 2 Only    | catp-4 | alimentary, epithelial, excretory, muscle, nervous, reproductive | 1                     |
| P90735     | Sodium/potassium-transporting ATPase subunit alpha      | Both                 | eat-6  | muscle                                                           | 2                     |
| G4S034     | SPeCtrin                                                | Biological 1 Only    | spc-1  | alimentary, epithelial, excretory, muscle, nervous, reproductive | 2                     |
| G5EF80     | Spermathecal Physiology Variant                         | Biological 1 Only    | spv-1  | nervous, reproductive                                            | 1                     |
| O02139     | Sperm-Specific family, class R                          | Biological 2 Only    | ssr-2  | alimentary, muscle                                               | 1                     |
| Q9BI86     | Spindle and Kinetochore-Associated protein homolog      | Biological 2 Only    | ska-3  | alimentary, epithelial, excretory, muscle, nervous, reproductive | 1                     |
| Q20060     | Structural maintenance of chromosomes protein 4         | Biological 2 Only    | smc-4  | alimentary                                                       | 2                     |
| O61794     | SUn (SUN) domain Containing Ossification factor homolog | Biological 2 Only    | suco-1 | alimentary, nervous                                              | 1                     |
| C6KRN1     | Suppressor of aph-1                                     | Biological 1 Only    | sao-1  | nervous, reproductive                                            | 1                     |
| A0A1I6CM95 | Suppressor of PAr-Two defect                            | Biological 2 Only    | spat-2 | alimentary, excretory, nervous                                   | 3                     |
| Q17768     | Suppressor of presenilin protein 3                      | Biological 2 Only    | spr-3  | alimentary, epithelial, excretory, muscle, nervous, reproductive | 1                     |
| Q9N537     | Suppressor of ZYg-1                                     | Biological 1 Only    | szy-2  | alimentary, epithelial, excretory, muscle, nervous, reproductive | 1                     |
| B1Q236     | Synaptogenesis protein syg-1                            | Biological 2 Only    | syg-1  | muscle, nervous, reproductive                                    | 1                     |
| O61707     | TAF (TBP-associated transcription factor) family        | Biological 2 Only    | taf-4  | alimentary, epithelial, excretory, muscle, nervous, reproductive | 1                     |
| G5EGK1     | Talin                                                   | Biological 1 Only    | tln-1  | alimentary, muscle, nervous                                      | 2                     |



| UniProt ID | Protein names                                       | Biological Replicate | Gene     | Body System                                                      | Peptides Modified No. |
|------------|-----------------------------------------------------|----------------------|----------|------------------------------------------------------------------|-----------------------|
| A0A164D380 | TBC (Tre-2/Bub2/Cdc16) domain family                | Biological 2 Only    | tbc-14   | alimentary, epithelial, excretory, muscle, nervous, reproductive | 1                     |
| P41988     | T-complex protein 1 subunit alpha                   | Biological 1 Only    | cct-1    | alimentary, epithelial, excretory, muscle, nervous               | 2                     |
| P47209     | T-complex protein 1 subunit epsilon                 | Biological 2 Only    | cct-5    | alimentary, epithelial, excretory, muscle, nervous, reproductive | 1                     |
| Q9N4J8     | T-complex protein 1 subunit gamma                   | Biological 2 Only    | cct-3    | alimentary, epithelial, excretory, muscle, nervous, reproductive | 1                     |
| Q22554     | TeTatriCopeptide repeat domain protein related      | Biological 1 Only    | ttc-17   | alimentary, epithelial, excretory, muscle, nervous, reproductive | 1                     |
| P52709     | Threonine--tRNA ligase, cytoplasmic                 | Biological 2 Only    | tars-1   | alimentary, muscle                                               | 1                     |
| Q18885     | Transcription factor BTF3 homolog                   | Biological 1 Only    | icd-1    | muscle                                                           | 4                     |
| P54811     | Transitional endoplasmic reticulum ATPase homolog 1 | Biological 2 Only    | cdc-48.1 | muscle, reproductive                                             | 2                     |
| P54812     | Transitional endoplasmic reticulum ATPase homolog 2 | Biological 2 Only    | cdc-48.2 | muscle                                                           | 2                     |
| O17759     | TransKeTolase homolog                               | Biological 1 Only    | tkt-1    | alimentary, muscle, nervous                                      | 2                     |
| B3WFW5     | Transmembrane 9 superfamily member                  | Biological 1 Only    | ZK858.6  | alimentary                                                       | 1                     |
| Q9GRZ9     | Transmembrane and Coiled-Coil protein               | Biological 1 Only    | tcc-1    | nervous, reproductive                                            | 2                     |
| D3KZG3     | Transmembrane channel-like protein 1                | Biological 2 Only    | tmc-1    | nervous                                                          | 1                     |
| Q21281     | Transmembrane matrix receptor MUP-4                 | Biological 1 Only    | mup-4    | epithelial, nervous                                              | 1                     |
| Q9XV18     | TransThyretin-Related family domain                 | Biological 2 Only    | ttr-12   | alimentary, epithelial, excretory, muscle, nervous, reproductive | 1                     |
| G5EG96     | Trehalase                                           | Biological 2 Only    | tre-5    | epithelial                                                       | 1                     |
| Q27249     | Tropomyosin isoforms c/e                            | Biological 2 Only    | lev-11   | alimentary, epithelial, excretory, muscle, nervous, reproductive | 2                     |
| Q9GYF1     | Troponin I 2                                        | Biological 1 Only    | unc-27   | epithelial                                                       | 1                     |

| UniProt ID | Protein names                         | Biological Replicate | Gene    | Body System                                                      | Peptides Modified No. |
|------------|---------------------------------------|----------------------|---------|------------------------------------------------------------------|-----------------------|
| Q9XUN9     | Troponin I 3                          | Biological 1 Only    | tnt-3   | muscle, reproductive                                             | 1                     |
| Q7Z072     | TropoNin T                            | Both                 | tnt-2   | muscle                                                           | 5                     |
| Q27371     | Troponin T                            | Biological 2 Only    | mup-2   | alimentary, epithelial, excretory, muscle, nervous, reproductive | 2                     |
| P91873     | Tubulin alpha chain                   | Biological 1 Only    | tba-6   | alimentary                                                       | 1                     |
| H2L2E8     | Tubulin alpha chain                   | Biological 1 Only    | tba-1   | epithelial                                                       | 2                     |
| G5EDD4     | Tubulin alpha chain                   | Both                 | tba-4   | nervous                                                          | 2                     |
| Q20221     | Tubulin alpha chain                   | Biological 2 Only    | tba-9   | alimentary, epithelial, excretory                                | 1                     |
| P34690     | Tubulin alpha-2 chain                 | Both                 | tba-2   | alimentary, muscle, nervous                                      | 1                     |
| P91910     | Tubulin alpha-3 chain                 | Both                 | mec-12  | alimentary, nervous                                              | 1                     |
| Q18817     | Tubulin beta chain                    | Biological 2 Only    | ben-1   | alimentary, epithelial, excretory, muscle, nervous, reproductive | 1                     |
| O17921     | Tubulin beta chain                    | Biological 2 Only    | tbb-1   | alimentary, epithelial, excretory, muscle, nervous, reproductive | 1                     |
| P12456     | Tubulin beta-1 chain                  | Both                 | mec-7   | muscle, nervous                                                  | 3                     |
| P52275     | Tubulin beta-2 chain                  | Biological 2 Only    | tbb-2   | excretory, muscle, reproductive                                  | 3                     |
| P41937     | Tubulin beta-4 chain (Beta-4-tubulin) | Biological 2 Only    | tbb-4   | alimentary, excretory, muscle, nervous                           | 2                     |
| P34475     | Tubulin gamma chain                   | Biological 2 Only    | tbg-1   | epithelial                                                       | 1                     |
| H2KZM9     | Tubulin Tyrosine Ligase Like          | Biological 2 Only    | ttll-11 | alimentary, muscle                                               | 1                     |
| Q6EUT8     | TWiK family of potassium channels     | Biological 1 Only    | twk-31  | alimentary, muscle                                               | 1                     |
| Q9XX01     | TWiK family of potassium channels     | Biological 2 Only    | twk-31  | alimentary, epithelial, excretory, muscle, nervous, reproductive | 1                     |
| O01497     | TYRosinase                            | Biological 2 Only    | tyr-4   | alimentary, nervous                                              | 1                     |
| O01435     | Tyrosine-protein phosphatase          | Biological 1 Only    | B0207.1 | alimentary, epithelial, excretory, muscle, nervous, reproductive | 1                     |

| UniProt ID | Protein names                                        | Biological Replicate | Gene     | Body System                                                      | Peptides Modified No. |
|------------|------------------------------------------------------|----------------------|----------|------------------------------------------------------------------|-----------------------|
| P91568     | Tyrosine-protein phosphatase                         | Biological 1 Only    | ZK354.8  | alimentary, epithelial, excretory, muscle, nervous, reproductive | 1                     |
| O01555     | Tyrosine-protein phosphatase                         | Biological 2 Only    | F47B3.1  | alimentary, muscle, nervous                                      | 1                     |
| G5EC24     | Tyrosine-protein phosphatase non-receptor type ptp-2 | Biological 2 Only    | ptp-2    | alimentary, epithelial, excretory, muscle, nervous, reproductive | 1                     |
| Q9U1W8     | U6 snRNA-associated Sm-like protein LSm3             | Biological 1 Only    | lsm-3    | alimentary, muscle                                               | 1                     |
| Q9UAV3     | Ubiquitin carboxyl-terminal hydrolase                | Biological 2 Only    | ubh-1    | alimentary, epithelial                                           | 1                     |
| Q22240     | Ubiquitin carboxyl-terminal hydrolase                | Biological 2 Only    | T05H10.1 | nervous                                                          | 3                     |
| G5EBW2     | Ubiquitin Specific Protease                          | Biological 1 Only    | usp-50   | alimentary, nervous, reproductive                                | 1                     |
| Q9U3Q6     | UDP-glucuronosyltransferase                          | Biological 1 Only    | ugt-22   | alimentary, nervous                                              | 1                     |
| P91039     | UDP-glucuronosyltransferase                          | Biological 2 Only    | ugt-25   | alimentary, epithelial, excretory, muscle, nervous, reproductive | 1                     |
| O16276     | UDP-glucuronosyltransferase                          | Biological 2 Only    | ugt-61   | alimentary                                                       | 1                     |
| Q21603     | UDP-glucuronosyltransferase                          | Biological 2 Only    | ugt-62   | alimentary, epithelial, excretory, muscle, nervous, reproductive | 1                     |
| G5EG62     | UNC-45                                               | Both                 | unc-45   | alimentary, nervous                                              | 2                     |
| Q8TA81     | Uncharacterized F-box protein ZK328.6                | Biological 2 Only    | ZK328.6  | alimentary, epithelial, excretory, muscle, nervous, reproductive | 1                     |
| Q21534     | Uncharacterized NTE family protein M110.7            | Biological 2 Only    | M110.7   | alimentary, epithelial, excretory, muscle, nervous, reproductive | 1                     |
| Q9XW61     | Uncharacterized protein                              | Biological 1 Only    | mrp-8    | alimentary, nervous                                              | 1                     |
| Q17490     | Uncharacterized protein                              | Biological 2 Only    | unc-44   | alimentary, excretory, muscle, nervous                           | 4                     |
| Q9XWN2     | Uncharacterized protein                              | Biological 1 Only    | dyf-19   | muscle                                                           | 1                     |
| Q19945     | Uncharacterized protein                              | Biological 2 Only    | daf-6    | epithelial, nervous                                              | 1                     |
| Q9NET8     | Uncharacterized protein                              | Biological 2 Only    | dyf-17   | nervous                                                          | 1                     |

| UniProt ID | Protein names           | Biological Replicate | Gene      | Body System                                                      | Peptides Modified No. |
|------------|-------------------------|----------------------|-----------|------------------------------------------------------------------|-----------------------|
| Q9U1Q7     | Uncharacterized protein | Biological 2 Only    | emb-4     | nervous                                                          | 1                     |
| K8FDY0     | Uncharacterized protein | Biological 2 Only    | hpo-34    | alimentary, epithelial, excretory, muscle, nervous, reproductive | 2                     |
| A0A0K3ARB5 | Uncharacterized protein | Biological 2 Only    | lev-11    | alimentary, epithelial, excretory, muscle, nervous, reproductive | 2                     |
| A0A0K3ATR6 | Uncharacterized protein | Biological 2 Only    | lev-11    | alimentary, epithelial, excretory, muscle, nervous, reproductive | 3                     |
| A0A0K3AWP0 | Uncharacterized protein | Both                 | lev-11    | alimentary, epithelial, excretory, muscle, nervous, reproductive | 7                     |
| Q20129     | Uncharacterized protein | Biological 2 Only    | mus-101   | alimentary, epithelial, excretory, muscle, nervous, reproductive | 1                     |
| G5EFR0     | Uncharacterized protein | Biological 2 Only    | tag-297   | alimentary, epithelial, excretory, muscle, nervous, reproductive | 1                     |
| A0A2C9C3B4 | Uncharacterized protein | Biological 1 Only    | F09G2.1   | alimentary, epithelial, nervous                                  | 1                     |
| B7FAR9     | Uncharacterized protein | Biological 1 Only    | Y43F8B.1  | unidentified                                                     | 1                     |
| C7IVR0     | Uncharacterized protein | Biological 1 Only    | D2062.13  | alimentary, epithelial, excretory, muscle, nervous, reproductive | 1                     |
| C7IVS0     | Uncharacterized protein | Biological 1 Only    | Y38H6C.25 | alimentary, epithelial, excretory, muscle, nervous, reproductive | 1                     |
| E5QCH1     | Uncharacterized protein | Biological 1 Only    | ZC376.6   | alimentary, epithelial, excretory, muscle, nervous, reproductive | 1                     |
| G4S0D7     | Uncharacterized protein | Biological 1 Only    | C16C8.22  | alimentary, epithelial, excretory, muscle, nervous, reproductive | 1                     |
| H2KYE2     | Uncharacterized protein | Biological 1 Only    | F26F12.3  | alimentary, nervous                                              | 1                     |

| UniProt ID | Protein names           | Biological Replicate | Gene     | Body System                                                      | Peptides Modified No. |
|------------|-------------------------|----------------------|----------|------------------------------------------------------------------|-----------------------|
| H2KZE1     | Uncharacterized protein | Biological 1 Only    | F44E7.5  | epithelial, muscle, nervous                                      | 1                     |
| H2KZE6     | Uncharacterized protein | Biological 1 Only    | F41B4.2  | alimentary, epithelial, excretory, muscle, nervous, reproductive | 1                     |
| L8E972     | Uncharacterized protein | Biological 1 Only    | K08F9.3  | alimentary, epithelial, excretory, muscle, nervous, reproductive | 1                     |
| O02060     | Uncharacterized protein | Biological 1 Only    | B0041.1  | alimentary, epithelial, excretory, muscle, nervous, reproductive | 1                     |
| O16302     | Uncharacterized protein | Biological 1 Only    | T05C3.2  | unidentified                                                     | 1                     |
| O16536     | Uncharacterized protein | Biological 1 Only    | C17A2.2  | unidentified                                                     | 1                     |
| O44893     | Uncharacterized protein | Biological 1 Only    | T20H9.6  | unidentified                                                     | 1                     |
| O45238     | Uncharacterized protein | Biological 1 Only    | C01G12.7 | unidentified                                                     | 1                     |
| O45398     | Uncharacterized protein | Biological 1 Only    | F22G12.4 | alimentary, nervous                                              | 1                     |
| O45855     | Uncharacterized protein | Biological 1 Only    | T27E7.1  | alimentary, epithelial, excretory, muscle, nervous, reproductive | 1                     |
| O76407     | Uncharacterized protein | Biological 1 Only    | T10B5.3  | nervous                                                          | 1                     |
| P90989     | Uncharacterized protein | Biological 1 Only    | B0432.8  | unidentified                                                     | 1                     |
| P91340     | Uncharacterized protein | Biological 1 Only    | F55F8.2  | unidentified                                                     | 1                     |
| P91368     | Uncharacterized protein | Biological 1 Only    | K11H12.5 | unidentified                                                     | 1                     |
| Q09491     | Uncharacterized protein | Biological 1 Only    | C32D5.12 | alimentary, epithelial, muscle, nervous                          | 1                     |
| Q17476     | Uncharacterized protein | Biological 1 Only    | B0334.4  | alimentary, epithelial, muscle, nervous                          | 1                     |
| Q17512     | Uncharacterized protein | Biological 1 Only    | B0491.5  | unidentified                                                     | 1                     |
| Q17711     | Uncharacterized protein | Biological 1 Only    | C06C3.3  | alimentary, epithelial, excretory, muscle, nervous, reproductive | 1                     |
| Q17863     | Uncharacterized protein | Biological 1 Only    | C09G1.2  | alimentary, nervous                                              | 1                     |
| Q18048     | Uncharacterized protein | Biological 1 Only    | C16E9.1  | unidentified                                                     | 1                     |
| Q20380     | Uncharacterized protein | Biological 1 Only    | F44A2.3  | unidentified                                                     | 1                     |
| Q21545     | Uncharacterized protein | Biological 1 Only    | M153.2   | unidentified                                                     | 1                     |

| UniProt ID | Protein names           | Biological Replicate | Gene       | Body System                                                      | Peptides Modified No. |
|------------|-------------------------|----------------------|------------|------------------------------------------------------------------|-----------------------|
| Q21753     | Uncharacterized protein | Biological 1 Only    | R05G6.5    | alimentary, excretory, nervous                                   | 1                     |
| Q22790     | Uncharacterized protein | Biological 1 Only    | T25G3.1    | unidentified                                                     | 1                     |
| Q22951     | Uncharacterized protein | Biological 1 Only    | F08F3.1    | alimentary, epithelial, reproductive                             | 1                     |
| Q22974     | Uncharacterized protein | Biological 1 Only    | F45F2.10   | alimentary, excretory, nervous                                   | 1                     |
| Q23346     | Uncharacterized protein | Biological 1 Only    | ZC477.7    | unidentified                                                     | 1                     |
| Q4W4Y5     | Uncharacterized protein | Biological 1 Only    | E02D9.1    | alimentary                                                       | 1                     |
| Q564W8     | Uncharacterized protein | Biological 1 Only    | C17E4.11   | alimentary                                                       | 1                     |
| Q5WRP2     | Uncharacterized protein | Biological 1 Only    | C11H1.9    | alimentary, muscle, nervous                                      | 2                     |
| Q5WRT0     | Uncharacterized protein | Biological 1 Only    | F46G11.1   | alimentary, epithelial, excretory, muscle, nervous, reproductive | 1                     |
| Q93784     | Uncharacterized protein | Biological 1 Only    | F54E4.2    | alimentary, epithelial, excretory, muscle, nervous, reproductive | 1                     |
| Q94010     | Uncharacterized protein | Biological 1 Only    | T08G11.1   | muscle                                                           | 2                     |
| Q94314     | Uncharacterized protein | Biological 1 Only    | ZK154.5    | alimentary                                                       | 1                     |
| Q95R17     | Uncharacterized protein | Biological 1 Only    | F43E2.6    | alimentary, nervous                                              | 1                     |
| Q95XU0     | Uncharacterized protein | Biological 1 Only    | Y67D8B.1   | alimentary, epithelial, excretory, muscle, nervous, reproductive | 1                     |
| Q965P8     | Uncharacterized protein | Biological 1 Only    | Y22D7AL.11 | alimentary, epithelial, excretory, muscle, nervous, reproductive | 1                     |
| Q965Q2     | Uncharacterized protein | Biological 1 Only    | Y22D7AL.9  | unidentified                                                     | 1                     |
| Q966I7     | Uncharacterized protein | Biological 1 Only    | K08D12.3   | muscle                                                           | 1                     |
| Q9BKY1     | Uncharacterized protein | Biological 1 Only    | Y22D7AR.3  | excretory, muscle                                                | 1                     |
| Q9N3L4     | Uncharacterized protein | Biological 1 Only    | Y50D7A.3   | excretory, muscle, nervous                                       | 1                     |
| Q9N564     | Uncharacterized protein | Biological 1 Only    | Y23B4A.1   | unidentified                                                     | 1                     |
| Q9N5B3     | Uncharacterized protein | Biological 1 Only    | W08E12.7   | unidentified                                                     | 2                     |
| Q9NA71     | Uncharacterized protein | Biological 1 Only    | Y57A10A.31 | reproductive                                                     | 1                     |

| UniProt ID | Protein names           | Biological Replicate | Gene      | Body System                                                      | Peptides Modified No. |
|------------|-------------------------|----------------------|-----------|------------------------------------------------------------------|-----------------------|
| Q9TZC6     | Uncharacterized protein | Biological 1 Only    | Y59C2A.1  | epithelial, muscle, nervous                                      | 1                     |
| Q9XWX8     | Uncharacterized protein | Biological 1 Only    | Y43F8B.1  | unidentified                                                     | 1                     |
| U4PLK4     | Uncharacterized protein | Biological 1 Only    | M02B7.2   | alimentary, muscle, nervous, reproductive                        | 1                     |
| U4PLX3     | Uncharacterized protein | Biological 1 Only    | Y53F4B.12 | unidentified                                                     | 1                     |
| A0A1X7RBP4 | Uncharacterized protein | Biological 2 Only    | ZK1193.2  | alimentary, epithelial, nervous                                  | 1                     |
| B5BM42     | Uncharacterized protein | Biological 2 Only    | T02G6.11  | unidentified                                                     | 1                     |
| B7WN93     | Uncharacterized protein | Biological 2 Only    | F28C6.9   | unidentified                                                     | 1                     |
| D3NQ89     | Uncharacterized protein | Biological 2 Only    | C35B1.2   | alimentary, epithelial, nervous                                  | 1                     |
| G5EBI7     | Uncharacterized protein | Biological 2 Only    | C17C3.13  | unidentified                                                     | 1                     |
| G5EC99     | Uncharacterized protein | Biological 2 Only    | F11F1.1   | alimentary, epithelial                                           | 1                     |
| G5ECF2     | Uncharacterized protein | Biological 2 Only    | F43D9.1   | unidentified                                                     | 1                     |
| G5ED69     | Uncharacterized protein | Biological 2 Only    | C33D3.5   | alimentary                                                       | 1                     |
| G5EDM0     | Uncharacterized protein | Biological 2 Only    | K08F9.4   | unidentified                                                     | 1                     |
| G5EDV0     | Uncharacterized protein | Biological 2 Only    | E01G4.6   | unidentified                                                     | 1                     |
| G5EE32     | Uncharacterized protein | Biological 2 Only    | T04F3.1   | unidentified                                                     | 1                     |
| G5EEA3     | Uncharacterized protein | Biological 2 Only    | H05L14.1  | unidentified                                                     | 1                     |
| G5EFE2     | Uncharacterized protein | Biological 2 Only    | Y32B12A.5 | unidentified                                                     | 1                     |
| G5EFF2     | Uncharacterized protein | Biological 2 Only    | F20C5.6   | alimentary, muscle, nervous                                      | 1                     |
| H2KYI5     | Uncharacterized protein | Biological 2 Only    | C06G3.5   | alimentary, epithelial, excretory, muscle, nervous, reproductive | 1                     |
| H9G2S0     | Uncharacterized protein | Biological 2 Only    | F08B12.4  | muscle, nervous                                                  | 1                     |
| K8ESI1     | Uncharacterized protein | Biological 2 Only    | C02H6.3   | unidentified                                                     | 1                     |
| O16547     | Uncharacterized protein | Biological 2 Only    | C35A11.4  | unidentified                                                     | 1                     |
| O16628     | Uncharacterized protein | Biological 2 Only    | K02F6.7   | unidentified                                                     | 1                     |
| O16738     | Uncharacterized protein | Biological 2 Only    | F45C12.9  | alimentary, excretory, nervous                                   | 1                     |
| O17164     | Uncharacterized protein | Biological 2 Only    | C24H12.2  | unidentified                                                     | 1                     |
| O17827     | Uncharacterized protein | Biological 2 Only    | F21A3.4   | unidentified                                                     | 1                     |
| O44895     | Uncharacterized protein | Biological 2 Only    | ZK484.3   | alimentary, excretory                                            | 1                     |

| UniProt ID | Protein names           | Biological Replicate | Gene     | Body System                                                      | Peptides Modified No. |
|------------|-------------------------|----------------------|----------|------------------------------------------------------------------|-----------------------|
| O76643     | Uncharacterized protein | Biological 2 Only    | T08E11.8 | unidentified                                                     | 1                     |
| P91287     | Uncharacterized protein | Biological 2 Only    | F27C1.1  | alimentary, epithelial, muscle, nervous                          | 1                     |
| Q09594     | Uncharacterized protein | Biological 2 Only    | R03D7.2  | alimentary, epithelial                                           | 1                     |
| Q17566     | Uncharacterized protein | Biological 2 Only    | C01G5.4  | unidentified                                                     | 1                     |
| Q18204     | Uncharacterized protein | Biological 2 Only    | C26C6.8  | alimentary, epithelial, excretory, muscle, nervous, reproductive | 1                     |
| Q18848     | Uncharacterized protein | Biological 2 Only    | C54G4.3  | excretory, muscle, nervous                                       | 1                     |
| Q18935     | Uncharacterized protein | Biological 2 Only    | D1046.4  | alimentary, epithelial, excretory, muscle, nervous, reproductive | 1                     |
| Q19295     | Uncharacterized protein | Biological 2 Only    | F10D7.1  | unidentified                                                     | 1                     |
| Q19589     | Uncharacterized protein | Biological 2 Only    | F19C7.2  | epithelial, nervous                                              | 1                     |
| Q19602     | Uncharacterized protein | Biological 2 Only    | F19H6.5  | epithelial, nervous                                              | 1                     |
| Q19654     | Uncharacterized protein | Biological 2 Only    | F20D6.10 | alimentary, muscle                                               | 1                     |
| Q19761     | Uncharacterized protein | Biological 2 Only    | F23D12.2 | unidentified                                                     | 1                     |
| Q20202     | Uncharacterized protein | Biological 2 Only    | F40E10.5 | alimentary, excretory, nervous                                   | 1                     |
| Q20626     | Uncharacterized protein | Biological 2 Only    | F49E2.5  | unidentified                                                     | 1                     |
| Q21171     | Uncharacterized protein | Biological 2 Only    | K03B4.4  | unidentified                                                     | 1                     |
| Q21247     | Uncharacterized protein | Biological 2 Only    | K05F1.1  | unidentified                                                     | 1                     |
| Q21841     | Uncharacterized protein | Biological 2 Only    | R08C7.4  | alimentary, epithelial                                           | 1                     |
| Q21850     | Uncharacterized protein | Biological 2 Only    | R08E3.1  | unidentified                                                     | 1                     |
| Q21953     | Uncharacterized protein | Biological 2 Only    | R12B2.3  | alimentary, nervous                                              | 1                     |
| Q22137     | Uncharacterized protein | Biological 2 Only    | T04A8.7  | alimentary, epithelial, excretory, muscle, nervous, reproductive | 1                     |
| Q22163     | Uncharacterized protein | Biological 2 Only    | T04F8.3  | unidentified                                                     | 1                     |
| Q22219     | Uncharacterized protein | Biological 2 Only    | T05C1.3  | excretory, epithelial                                            | 1                     |
| Q22719     | Uncharacterized protein | Biological 2 Only    | T24B8.3  | unidentified                                                     | 1                     |
| Q23119     | Uncharacterized protein | Biological 2 Only    | W02B12.1 | alimentary, epithelial, excretory, muscle, nervous, reproductive | 1                     |



| UniProt ID | Protein names           | Biological Replicate | Gene       | Body System                                          | Peptides Modified No. |
|------------|-------------------------|----------------------|------------|------------------------------------------------------|-----------------------|
| Q23616     | Uncharacterized protein | Biological 2 Only    | ZK822.5    | alimentary, excretory, muscle, nervous, reproductive | 1                     |
| Q2L6W7     | Uncharacterized protein | Biological 2 Only    | R11G1.7    | nervous                                              | 1                     |
| Q3HKD3     | Uncharacterized protein | Biological 2 Only    | C29E4.14   | alimentary, nervous                                  | 1                     |
| Q688Z7     | Uncharacterized protein | Biological 2 Only    | Y48G1BL.7  | unidentified                                         | 1                     |
| Q7JNM2     | Uncharacterized protein | Biological 2 Only    | ZC13.1     | alimentary, nervous                                  | 1                     |
| Q7YTK4     | Uncharacterized protein | Biological 2 Only    | R09H10.6   | unidentified                                         | 1                     |
| Q8IAB4     | Uncharacterized protein | Biological 2 Only    | Y119D3B.12 | alimentary                                           | 1                     |
| Q8ITV6     | Uncharacterized protein | Biological 2 Only    | Y44E3A.6   | alimentary, nervous                                  | 1                     |
| Q8WQD9     | Uncharacterized protein | Biological 2 Only    | M176.10    | alimentary, nervous                                  | 1                     |
| Q93718     | Uncharacterized protein | Biological 2 Only    | F43G9.4    | alimentary, epithelial, muscle                       | 1                     |
| Q93763     | Uncharacterized protein | Biological 2 Only    | F53C11.5   | alimentary, nervous                                  | 1                     |
| Q95Q15     | Uncharacterized protein | Biological 2 Only    | Y55D9A.2   | alimentary                                           | 1                     |
| Q95QC9     | Uncharacterized protein | Biological 2 Only    | K09F5.6    | unidentified                                         | 1                     |
| Q966A0     | Uncharacterized protein | Biological 2 Only    | Y5H2B.1    | unidentified                                         | 1                     |
| Q966H1     | Uncharacterized protein | Biological 2 Only    | R05G9.3    | unidentified                                         | 1                     |
| Q9N393     | Uncharacterized protein | Biological 2 Only    | Y54H5A.1   | unidentified                                         | 1                     |
| Q9N522     | Uncharacterized protein | Biological 2 Only    | Y39A3A.2   | unidentified                                         | 1                     |
| Q9N5Z0     | Uncharacterized protein | Biological 2 Only    | C09E7.4    | nervous                                              | 1                     |
| Q9TYZ4     | Uncharacterized protein | Biological 2 Only    | H35B03.1   | unidentified                                         | 1                     |
| Q9U1Y4     | Uncharacterized protein | Biological 2 Only    | Y60A9.1    | unidentified                                         | 1                     |
| Q9XUD6     | Uncharacterized protein | Biological 2 Only    | F55G11.8   | unidentified                                         | 1                     |
| Q9XVF1     | Uncharacterized protein | Biological 2 Only    | C04F12.1   | alimentary                                           | 1                     |
| Q9XVN8     | Uncharacterized protein | Biological 2 Only    | F36A2.2    | nervous                                              | 1                     |
| Q9XVU5     | Uncharacterized protein | Biological 2 Only    | F15B9.8    | alimentary, epithelial                               | 1                     |
| X5M5W2     | Uncharacterized protein | Biological 2 Only    | T28C6.7    | alimentary, nervous                                  | 1                     |
| O61201     | Uncharacterized protein | Both                 | F39C12.1   | alimentary, excretory, epithelial, nervous           | 1                     |
| Q22167     | Uncharacterized protein | Both                 | T04F8.6    | unidentified                                         | 1                     |
| Q22631     | Uncharacterized protein | Both                 | T21B6.3    | unidentified                                         | 2                     |
| Q22850     | Uncharacterized protein | Both                 | T28F4.5    | unidentified                                         | 1                     |

| UniProt ID | Protein names                                    | Biological Replicate | Gene     | Body System                                                      | Peptides Modified No. |
|------------|--------------------------------------------------|----------------------|----------|------------------------------------------------------------------|-----------------------|
| Q09223     | Uncharacterized protein B0228.6                  | Biological 2 Only    | B0228.6  | alimentary, excretory, muscle, nervous                           | 1                     |
| Q7JPK6     | Uncharacterized protein B0361.3                  | Biological 1 Only    | B0361.3  | alimentary, muscle, excretory, nervous                           | 1                     |
| Q11081     | Uncharacterized protein B0563.5                  | Biological 1 Only    | B0563.5  | alimentary, epithelial, excretory, muscle, nervous, reproductive | 1                     |
| Q11188     | Uncharacterized protein C05D11.9                 | Biological 2 Only    | C05D11.9 | alimentary, epithelial, excretory, muscle, nervous, reproductive | 1                     |
| P34352     | Uncharacterized protein C30A5.10                 | Biological 2 Only    | C30A5.10 | alimentary, epithelial, excretory, muscle, nervous, reproductive | 1                     |
| P48322     | Uncharacterized protein C36E8.1                  | Biological 2 Only    | C36E8.1  | nervous                                                          | 2                     |
| Q19191     | Uncharacterized protein F08B12.4                 | Biological 2 Only    | F08B12.4 | muscle, nervous                                                  | 1                     |
| P41879     | Uncharacterized protein F37A4.1                  | Biological 2 Only    | F37A4.1  | nervous                                                          | 1                     |
| Q10123     | Uncharacterized protein F52C9.3                  | Biological 2 Only    | F52C9.3  | nervous                                                          | 1                     |
| Q10020     | Uncharacterized protein T28D9.1                  | Biological 1 Only    | T28D9.1  | alimentary, nervous                                              | 2                     |
| Q09359     | Uncharacterized protein ZK1307.1                 | Biological 1 Only    | ZK1307.1 | alimentary, epithelial, excretory, muscle, nervous, reproductive | 1                     |
| P34645     | Uncharacterized protein ZK512.7                  | Biological 2 Only    | ZK512.7  | alimentary, excretory, epithelial, muscle, nervous               | 1                     |
| P34654     | Uncharacterized protein ZK632.9                  | Biological 2 Only    | ZK632.9  | alimentary                                                       | 1                     |
| P34680     | Uncharacterized protein ZK757.2                  | Biological 1 Only    | ZK757.2  | alimentary, epithelial, excretory, muscle, nervous, reproductive | 1                     |
| P52715     | Uncharacterized serine carboxypeptidase F13S12.6 | Biological 2 Only    | F13D12.6 | excretory, epithelial, muscle, nervous                           | 1                     |
| Q95X44     | Vacuolar H ATPase                                | Biological 1 Only    | vha-8    | alimentary, epithelial                                           | 2                     |
| Q9U1Q4     | Valine--tRNA ligase                              | Biological 2 Only    | glp-4    | alimentary, nervous                                              | 1                     |
| H2KYR1     | VIG (Drosophila Vasa Intronic Gene) ortholog     | Both                 | vig-1    | alimentary, epithelial, reproductive, muscle, nervous            | 1                     |

| UniProt ID | Protein names                                  | Biological Replicate | Gene    | Body System                                                      | Peptides Modified No. |
|------------|------------------------------------------------|----------------------|---------|------------------------------------------------------------------|-----------------------|
| Q9XW92     | V-type proton ATPase catalytic subunit A       | Biological 2 Only    | vha-13  | alimentary, excretory                                            | 4                     |
| P34462     | V-type proton ATPase subunit D                 | Biological 2 Only    | vha-14  | alimentary, excretory, nervous                                   | 1                     |
| Q9U229     | Worm AIF (Apoptosis inducing factor) Homolog   | Biological 2 Only    | wah-1   | alimentary, nervous                                              | 1                     |
| Q965Q8     | Xylosyltransferase sqv-6                       | Biological 1 Only    | sqv-6   | reproductive                                                     | 1                     |
| Q21740     | Yeast Enhancer of DeCapping homolog            | Biological 1 Only    | edc-3   | alimentary, epithelial, excretory, muscle, nervous, reproductive | 1                     |
| Q7K7S3     | Zinc finger, HIT-type                          | Biological 2 Only    | zhit-2  | alimentary, nervous                                              | 1                     |
| Q20176     | Zinc metalloproteinase nas-39                  | Biological 1 Only    | nas-39  | alimentary, excretory, muscle, nervous                           | 1                     |
| Q17996     | Zrt (ZRT), Irt-(IRT-) like Protein Transporter | Biological 2 Only    | zipt-13 | alimentary, epithelial, excretory, muscle, nervous, reproductive | 1                     |
| Q23529     | Zygote defective protein 12                    | Biological 2 Only    | zyg-12  | reproductive                                                     | 1                     |
| G5EEM5     | Zygote defective protein 9                     | Biological 2 Only    | zyg-9   | reproductive                                                     | 1                     |
